# Supplementary material
Source: publisher figshare collection journal article supplement (https://sage.figshare.com/ndownloader/files/17922440)

Supplementary materials

**Phenylspirodrimane derivatives from cultures of the fungus *Stachybotrys chartarum* YIM DT 10079**

<sup>a</sup> *Key Laboratory for Microbial Resources, Ministry of Education, Yunnan Institute of Microbiology, Yunnan University, Kunming 650091, P. R. China*

<sup>b</sup> *Engineering and Technology Research Center of Liupanshan Resources, College of Chemistry and Chemical Engineering, Ningxia Normal University, Guyuan 756000, P. R. China*

<sup>c</sup> *School of Chemical Biology and Environment, Yuxi Normal University, Yuxi 653100, P. R. China*

<sup>d</sup> *BioBioPha Co., Ltd., Kunming 650201, P. R. China*

*dingjh\_nx@126.com; f.wang@mail.biobiopha.com; hudongbao@126.com; mlwen@ynu.edu.cn.*

**Note**

1. These authors contributed equally to this work and should be considered as co-first authors.

### **Supplemental file (Figure) Legend**

Figure S1.  $^1\text{H}$ -NMR spectrum of Compound **1**

Figure S2.  $^{13}\text{C}$ -NMR spectrum of Compound **1**

Figure S3. The HSQC spectrum of Compound **1**

Figure S4. The  $^1\text{H}$ - $^1\text{H}$  COSY spectrum of Compound **1**

Figure S5. The HMBC spectrum of Compound **1**

Figure S6. The ROESY spectrum of Compound **1**

Figure S7. HRESIMS spectrum of Compound **1**

Figure S8. The UV spectrum of Compound **1**

Figure S9. The IR spectrum of Compound **1**

10.000  
7.500  
7.300  
7.100  
6.900  
6.700  
6.500  
6.300  
6.100  
5.900  
5.700  
5.500  
5.300  
5.100  
4.900  
4.700  
4.500  
4.300  
4.100  
3.900  
3.700  
3.500  
3.300  
3.100  
2.900  
2.700  
2.500  
2.300  
2.100  
1.900  
1.700  
1.500  
1.300  
1.100  
0.900  
0.700  
0.500  
0.300  
0.100

0.3194  
4.23123  
4.0991  
4.0026  
3.9389  
3.8581  
3.8055  
3.7499  
3.6918  
3.6314  
3.5722  
3.5124  
3.4533  
3.3940  
3.3347  
3.2751  
3.2151  
3.1555  
3.0955  
3.0352  
2.9748  
2.9143  
2.8537  
2.7932  
2.7326  
2.6719  
2.6111  
2.5502  
2.4893  
2.4283  
2.3672  
2.3061  
2.2449  
2.1834  
2.1218  
2.0601  
1.9983  
1.9364  
1.8744  
1.8123  
1.7501  
1.6878  
1.6254  
1.5629  
1.5003  
1.4376  
1.3748  
1.3119  
1.2489  
1.1858  
1.1226  
1.0593  
1.0000  
0.9366  
0.8731  
0.8095  
0.7458  
0.6820  
0.6181  
0.5541  
0.4900  
0.4259  
0.3617  
0.2974  
0.2331  
0.1688  
0.1045  
0.0402  
0.0000

Current Data Parameters  
NAME: m1275  
EXPNO: 1  
PROCNO: 1  
F2 - Acquisition Parameters  
Date\_: 20150414  
Time: 00:30  
INSTRUM: spect  
PROBHD: 5 mm QNP 1H/13  
PULPROG: zgpg30  
TD: 65536  
SOLVENT: CDCl3  
NS: 4096  
DS: 4  
SWH: 7180.908 Hz  
FIDRES: 0.109018 Hz  
AQ: 0.161600 sec  
RG: 139  
SN: 60 600 uspc  
SFO: 100.626130 MHz  
TE: 290.2 K  
D1: 1.0000000 sec  
DELTA: 0.0000000 sec  
NUC1: 13C  
NUC2: 1H  
===== CHANNEL f1 =====  
MAG1: 1H  
P1: 12.00 usec  
PL1: -1.00 dB  
SFO1: 400.1321113 MHz  
F2 - Processing parameters  
SI: 32768  
SF: 400.1321113 MHz  
WDW: EM  
SSB: 0  
LB: 0.30 Hz  
GB: 0  
PC: 2.00  
TD: 65536  
FIDRES: 0.109018 Hz  
AQ: 0.161600 sec  
RG: 139  
SN: 60 600 uspc  
SFO: 100.626130 MHz  
TE: 290.2 K  
D1: 1.0000000 sec  
DELTA: 0.0000000 sec  
NUC1: 13C  
NUC2: 1H  
===== CHANNEL f2 =====  
MAG2: 13C  
P2: 12.00 usec  
PL2: -1.00 dB  
SFO2: 101.626130 MHz  
F2 - Processing parameters  
SI: 32768  
SF: 101.626130 MHz  
WDW: EM  
SSB: 0  
LB: 0.30 Hz  
GB: 0  
PC: 2.00  
TD: 65536  
FIDRES: 0.109018 Hz  
AQ: 0.161600 sec  
RG: 139  
SN: 60 600 uspc  
SFO: 101.626130 MHz  
TE: 290.2 K  
D1: 1.0000000 sec  
DELTA: 0.0000000 sec  
NUC1: 13C  
NUC2: 1H

10.000  
7.500  
7.300  
7.100  
6.900  
6.700  
6.500  
6.300  
6.100  
5.900  
5.700  
5.500  
5.300  
5.100  
4.900  
4.700  
4.500  
4.300  
4.100  
3.900  
3.700  
3.500  
3.300  
3.100  
2.900  
2.700  
2.500  
2.300  
2.100  
1.900  
1.700  
1.500  
1.300  
1.100  
0.900  
0.700  
0.500  
0.300  
0.100

0.3194  
4.23123  
4.0991  
4.0026  
3.9389  
3.8581  
3.8055  
3.7499  
3.6918  
3.6314  
3.5722  
3.5124  
3.4533  
3.3940  
3.3347  
3.2751  
3.2151  
3.1555  
3.0955  
3.0352  
2.9748  
2.9143  
2.8537  
2.7932  
2.7326  
2.6719  
2.6111  
2.5502  
2.4893  
2.4283  
2.3672  
2.3061  
2.2449  
2.1834  
2.1218  
2.0601  
2.0000  
1.9366  
1.8731  
1.8095  
1.7458  
1.6820  
1.6181  
1.5541  
1.4900  
1.4259  
1.3617  
1.2974  
1.2331  
1.1688  
1.1045  
1.0402  
0.9759  
0.9116  
0.8473  
0.7830  
0.7187  
0.6544  
0.5901  
0.5258  
0.4615  
0.3972  
0.3329  
0.2686  
0.2043  
0.1400  
0.0757  
0.0114  
0.0000

10.000  
7.500  
7.300  
7.100  
6.900  
6.700  
6.500  
6.300  
6.100  
5.900  
5.700  
5.500  
5.300  
5.100  
4.900  
4.700  
4.500  
4.300  
4.100  
3.900  
3.700  
3.500  
3.300  
3.100  
2.900  
2.700  
2.500  
2.300  
2.100  
1.900  
1.700  
1.500  
1.300  
1.100  
0.900  
0.700  
0.500  
0.300  
0.100

0.3194  
4.23123  
4.0991  
4.0026  
3.9389  
3.8581  
3.8055  
3.7499  
3.6918  
3.6314  
3.5722  
3.5124  
3.4533  
3.3940  
3.3347  
3.2751  
3.2151  
3.1555  
3.0955  
3.0352  
2.9748  
2.9143  
2.8537  
2.7932  
2.7326  
2.6719  
2.6111  
2.5502  
2.4893  
2.4283  
2.3672  
2.3061  
2.2449  
2.1834  
2.1218  
2.0601  
2.0000  
1.9366  
1.8731  
1.8095  
1.7458  
1.6820  
1.6181  
1.5541  
1.4900  
1.4259  
1.3617  
1.2974  
1.2331  
1.1688  
1.1045  
1.0402  
0.9759  
0.9116  
0.8473  
0.7830  
0.7187  
0.6544  
0.5901  
0.5258  
0.4615  
0.3972  
0.3329  
0.2686  
0.2043  
0.1400  
0.0757  
0.0114  
0.0000

10.000  
7.500  
7.300  
7.100  
6.900  
6.700  
6.500  
6.300  
6.100  
5.900  
5.700  
5.500  
5.300  
5.100  
4.900  
4.700  
4.500  
4.300  
4.100  
3.900  
3.700  
3.500  
3.300  
3.100  
2.900  
2.700  
2.500  
2.300  
2.100  
1.900  
1.700  
1.500  
1.3

c13 DMSO av600

===== CHANNEL F1 =====

| NAME    | VALUE          |
|---------|----------------|
| SNAME   | 001719         |
| EXPNO   | 44             |
| FREQNO  | 1              |
| INSTR   | 20150423       |
| TD      | 3.57           |
| INSTRUM | 90001          |
| PROBHD  | 5 mm CPDPC 1H- |
| TD      | 3200           |
| SOLVENT | DMSO           |
| NS      | 174            |
| DS      | 39063.105 Hz   |
| F2FREQ  | 6.596044 Hz    |
| AQ      | 0.836070 sec   |
| RG      | 1292           |
| IN      | 32.803 kHz     |
| DE      | 20.05 kHz      |
| TD      | 320.3          |
| Z1      | 3.0000000 sec  |
| Z2      | 0.0300000 sec  |
| TD      | 1              |

===== CHANNEL F2 =====

| NAME    | VALUE          |
|---------|----------------|
| EXPNO   | 18             |
| FREQNO  | 80.05 kHz      |
| INSTR   | 9.0001         |
| TD      | 25.44 dB       |
| INSTRUM | 1.5000000 Hz   |
| PROBHD  | 0.0440000 Hz   |
| TD      | 600.1300000 Hz |
| DE      | 32704          |
| TD      | 150.9026401 Hz |
| DS      | 3              |
| DE      | 1.00 Hz        |
| LA      | 0              |
| GB      | 0              |
| PC      | 1.40           |

174.18 166.08 158.18 156.08 144.26 112.49 109.80 105.45 98.27 73.38 51.87 49.21 46.07 45.07 39.93 38.63 35.43 33.07 32.99 32.72 32.54 32.34 29.64 29.44 27.35 27.15 26.94 26.74 26.54 26.34 26.14 25.94 25.74 25.54 25.34 25.14 24.94 24.74 24.54 24.34 24.14 23.94 23.74 23.54 23.34 23.14 22.94 22.74 22.54 22.34 22.14 21.94 21.74 21.54 21.34 21.14 20.94 20.74 20.54 20.34 20.14 19.94 19.74 19.54 19.34 19.14 18.94 18.74 18.54 18.34 18.14 17.94 17.74 17.54 17.34 17.14 16.94 16.74 16.54 16.34 16.14 15.94 15.74 15.54 15.34 15.14 14.94 14.74 14.54 14.34 14.14 13.94 13.74 13.54 13.34 13.14 12.94 12.74 12.54 12.34 12.14 11.94 11.74 11.54 11.34 11.14 10.94 10.74 10.54 10.34 10.14 9.94 9.74 9.54 9.34 9.14 8.94 8.74 8.54 8.34 8.14 7.94 7.74 7.54 7.34 7.14 6.94 6.74 6.54 6.34 6.14 5.94 5.74 5.54 5.34 5.14 4.94 4.74 4.54 4.34 4.14 3.94 3.74 3.54 3.34 3.14 2.94 2.74 2.54 2.34 2.14 1.94 1.74 1.54 1.34 1.14 0.94 0.74 0.54 0.34 0.14

160 150 140 130 120 110 100 90 80 70 60 50 40 30 20 10 ppm

**Figure S3** HSQC (600 MHz) spectrum of compound **1**.

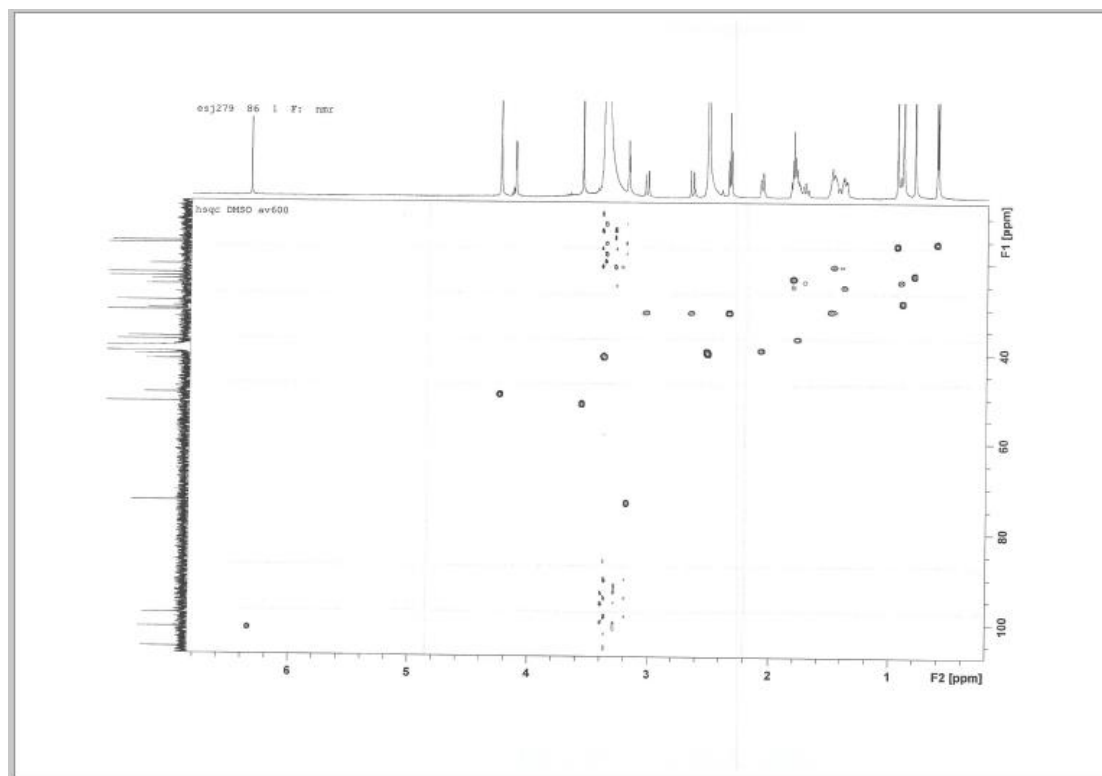

**Figure S4.** HMBC (600 MHz) spectrum of compound **1**.

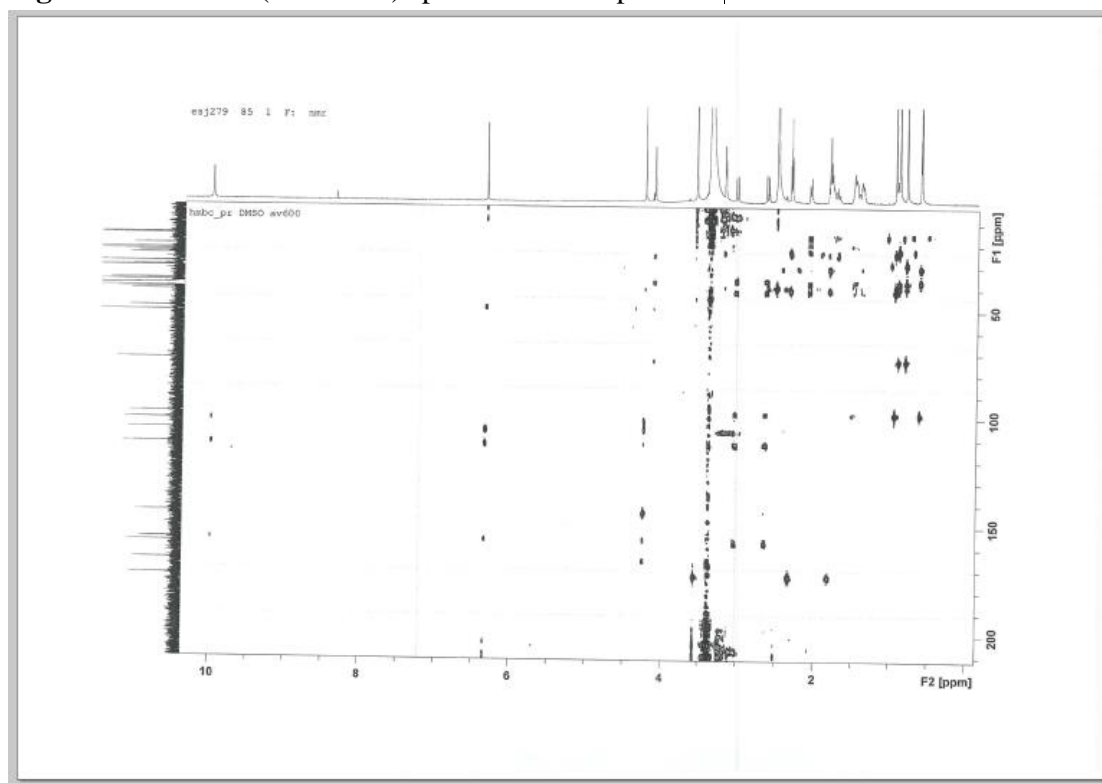

**Figure S5.**  $^1\text{H}$ - $^1\text{H}$  COSY (600 MHz) spectrum of compound **1**.

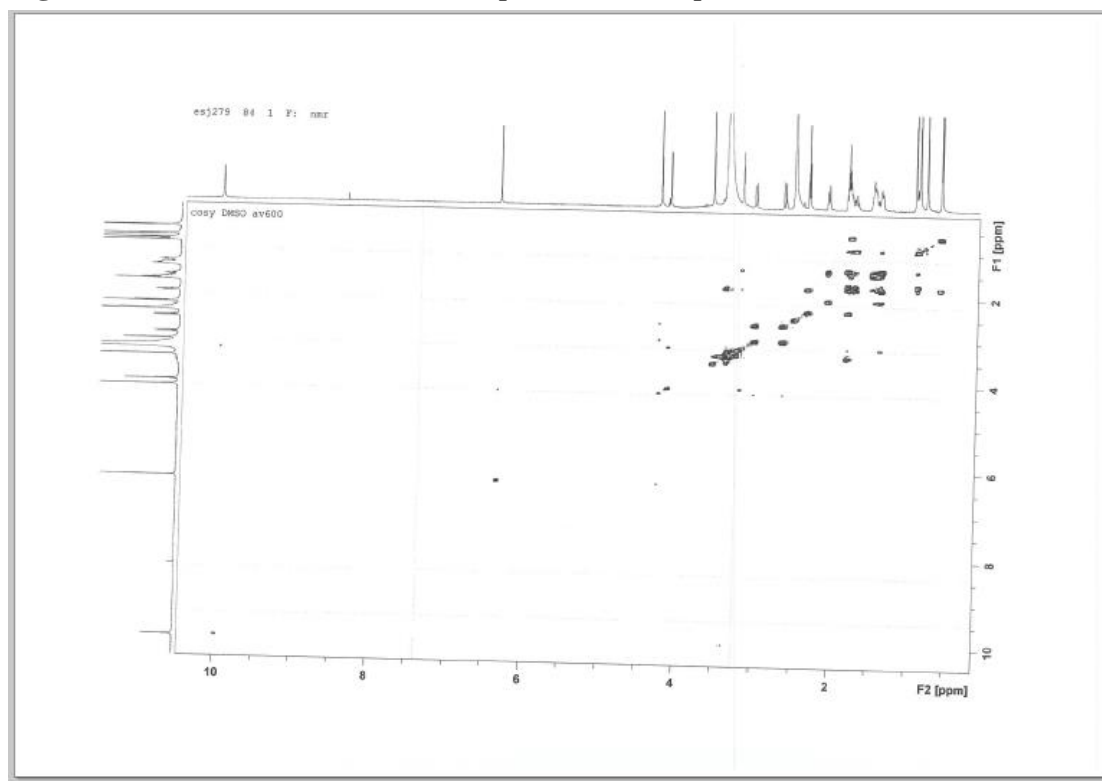

**Figure S6.** ROESY (600 MHz) spectrum of compound **1**.

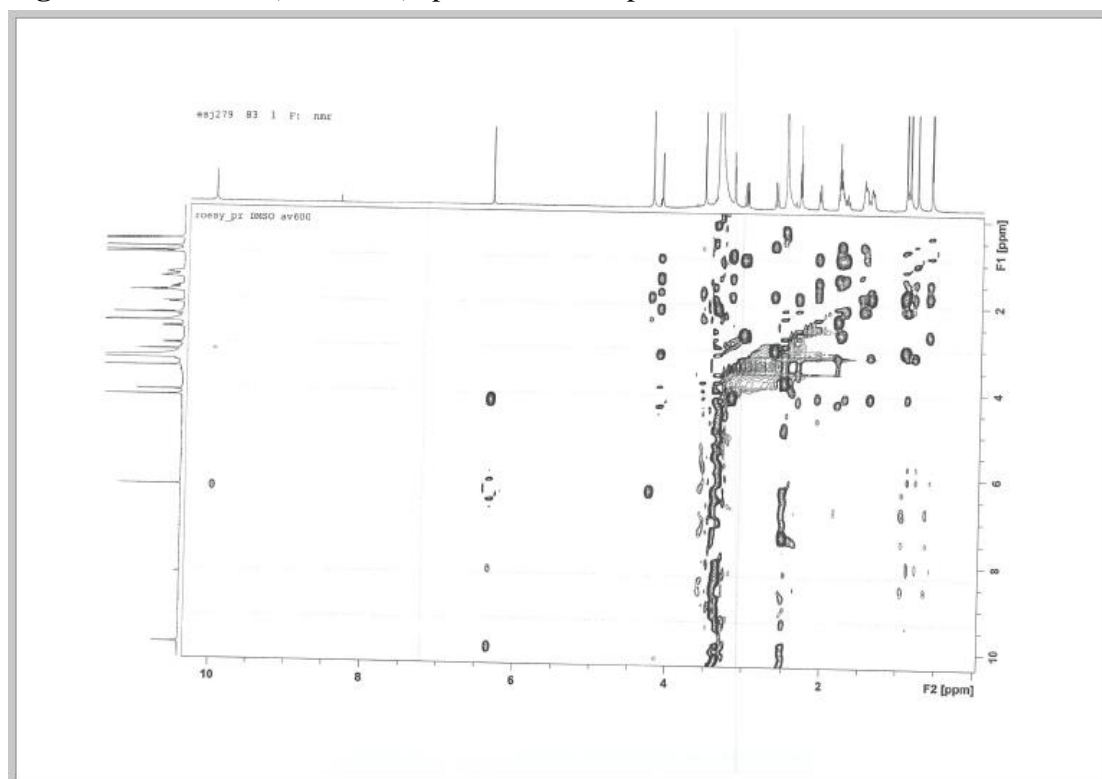

Figure S7. HREIMS spectrum of compound 1.

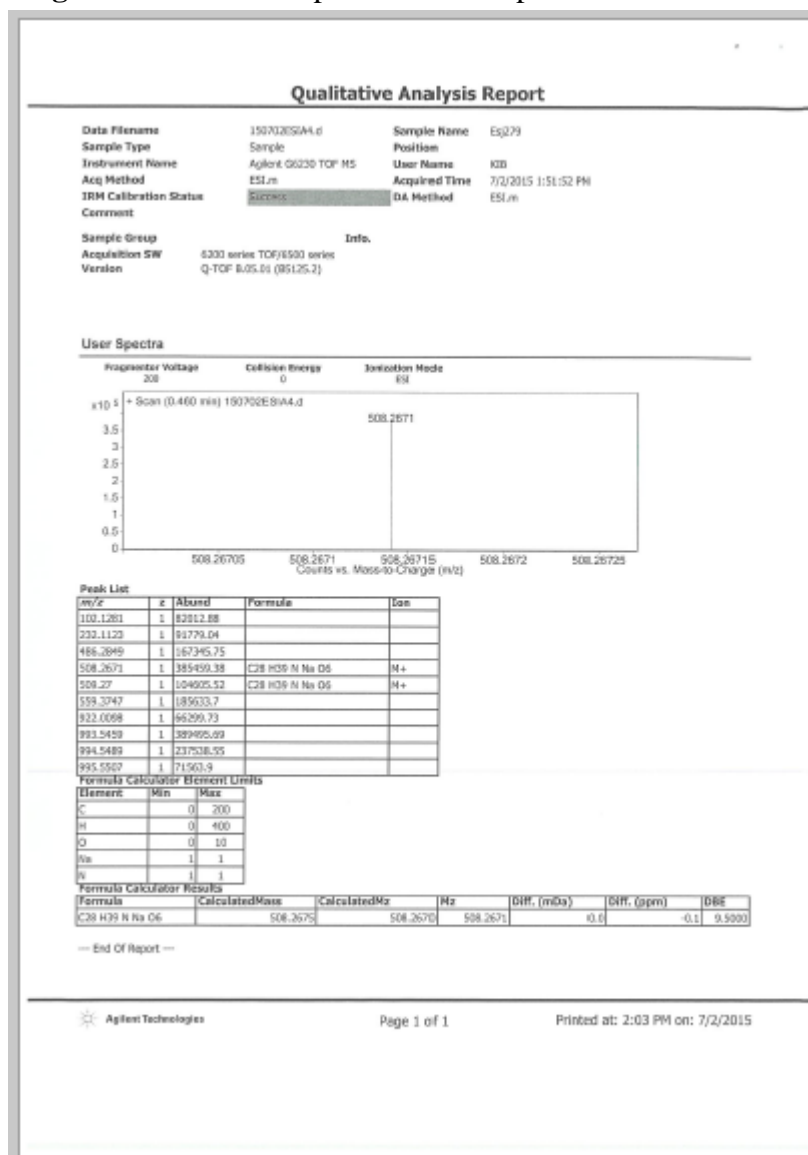

Figure S8. The UV spectrum of Compound 1

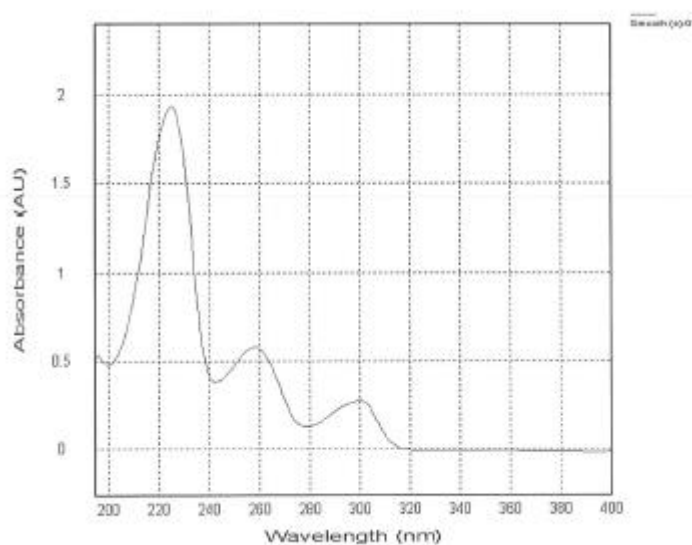

Figure S9. The IR spectrum of Compound **1**

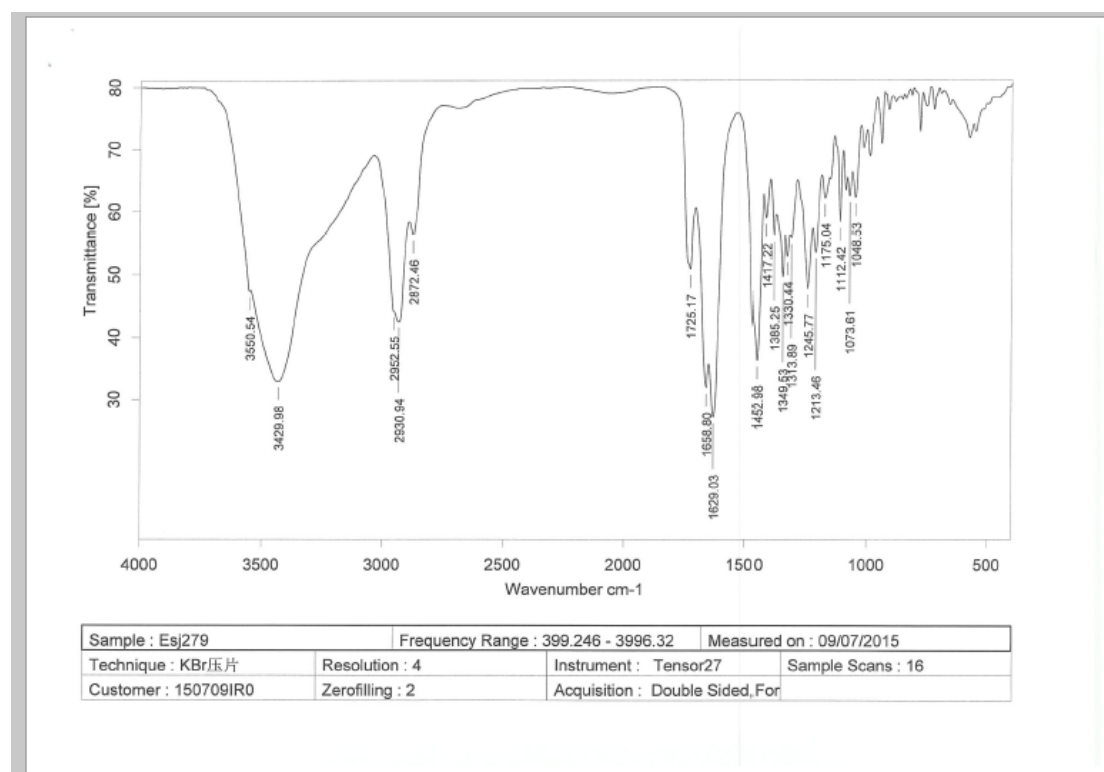

Supplement: Supplementary file 1 [file 17922440]
